# Supplementary material for: Emission of volatile halogenated organic compounds over various Dead Sea landscapes
Source: Copernicus journal article supplement (doi:10.5194/acp-19-7667-2019), 2019-06-07
Supplement: Supplementary file 1 [file acp-19-7667-2019-supplement.pdf]

Supplement of Atmos. Chem. Phys., 19, 7667–7690, 2019  
<https://doi.org/10.5194/acp-19-7667-2019-supplement>  
© Author(s) 2019. This work is distributed under  
the Creative Commons Attribution 4.0 License.

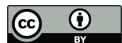

*Supplement of*

## **Emission of volatile halogenated organic compounds over various Dead Sea landscapes**

**Moshe Shechner et al.**

*Correspondence to:* Eran Tas ([eran.tas@mail.huji.ac.il](mailto:eran.tas@mail.huji.ac.il))

The copyright of individual parts of the supplement might differ from the CC BY 4.0 License.

33 **S1. Lifetime and main sink pathways for the investigated VHOCs**

34 **Table S1.** Average lifetimes and primary removal pathways for the VHOCs<sup>a</sup>.

35

| Species                             | Average lifetime        | Primary removal pathway       |    |
|-------------------------------------|-------------------------|-------------------------------|----|
| <b>CHBr<sub>3</sub></b>             | 15 days                 | J <sup>c</sup> >OH            | 36 |
| <b>CH<sub>2</sub>Br<sub>2</sub></b> | 94 days                 | OH                            | 37 |
| <b>CHBr<sub>2</sub>Cl</b>           | 32 days                 | OH>J                          | 38 |
| <b>CHBrCl<sub>2</sub></b>           | 41 days                 | OH>J                          | 39 |
| <b>C<sub>2</sub>HCl<sub>3</sub></b> | 5 days                  | OH                            | 40 |
| <b>CHCl<sub>3</sub></b>             | 112 days                | OH                            | 41 |
| <b>CH<sub>3</sub>I</b>              | 4 days                  | J>OH                          | 42 |
| <b>CH<sub>3</sub>Br</b>             | 1.8 years <sup>b</sup>  | OH>loss in soil>loss in ocean | 43 |
| <b>CH<sub>3</sub>Cl</b>             | 1.57 years <sup>b</sup> | OH>loss in ocean>loss in soil | 44 |

45

46 <sup>a</sup> See more details in (Carpenter et al., 2014).

47 <sup>b</sup> Partial lifetime against reaction with OH.

48 <sup>c</sup> J, photolysis first-order [rate coefficient](#).

49 **S2. Specification of the mass spectrometry instrumentation and techniques**

50

51 **Table S2.** Specification of instrumentation and techniques used to analyze the sampled gas and corresponding  
 52 precision.

53

54

| Species                         | System <sup>a</sup> | Precision (%) |
|---------------------------------|---------------------|---------------|
| CHBr <sub>3</sub>               | D, MSD              | 1.6           |
| CH <sub>2</sub> Br <sub>2</sub> | D                   | 1.6           |
| CHBr <sub>2</sub> Cl            | D                   | 9.3           |
| CHBrCl <sub>2</sub>             | D                   | 2.0           |
| CH <sub>2</sub> Cl <sub>2</sub> | C, MSD              | 4.5           |
| C <sub>2</sub> HCl <sub>3</sub> | MSD                 | ≤ 5.0         |
| CHCl <sub>3</sub>               | C, D, MSD           | 1.1           |
| CH <sub>3</sub> I               | C,D                 | 1.1           |
| CH <sub>3</sub> Br              | MSD                 | 1.7           |
| CH <sub>3</sub> Cl              | B, MSD              | 1.5           |

74 <sup>a</sup> Indicates the applied column and detector for quantifying species concentration: B, DB-1 column + flame  
 75 ionization detector (FID); C, DB-5 column + electron-capture detector (ECD); D, RESTEK1701 column + ECD;  
 76 MSD, DB-5 MS column + mass spectrometer.

77 **S3. Measured VHOC mixing ratios**

78 Table S3 compares the measured mixing ratios at the different measurement sites and reported  
79 values for the global marine boundary layer (MBL).

80

81 **Table S3.** Comparison of VHOC mixing ratios (in pptv) measured at the Dead Sea to their corresponding values  
82 at the marine boundary layer (MBL). Unless otherwise specified, the table presents median, minimum and  
83 maximum VHOC mixing ratios measured at different sites at the Dead Sea (see Table 1 in the main text for site  
84 abbreviations) and in the MBL as reported by Carpenter et al. (2014).

| Species                             | Median/<br>range | BARE-<br>MSMR | BARE-<br>MSD | COAST-<br>EGD | COAST-<br>TKM | TMRX-<br>ET | WM-<br>KLY | SEA-<br>KDM | All sites        | MBL                          |
|-------------------------------------|------------------|---------------|--------------|---------------|---------------|-------------|------------|-------------|------------------|------------------------------|
| <b>CHBr<sub>3</sub></b>             | Median           | 11.3          | 11.0         | 8.0           | 2.6           | 4.7         | 3.1        | 11.0        | <b>6.2</b>       | <b>1.2</b>                   |
|                                     | Range            | 5.6–16.3      | 6.0–22.6     | 4.4–16.8      | 3.6–1.9       | 2.9–7.1     | 2.3–3.5    | 5.4–16.5    | <b>1.9–22.6</b>  | <b>0.4–4.0</b>               |
| <b>CH<sub>2</sub>Br<sub>2</sub></b> | Median           | 0.9           | 2.7          | 1.8           | 0.8           | 1.3         | 1.1        | 1.4         | <b>1.1</b>       | <b>0.9</b>                   |
|                                     | Range            | 0.9–1.0       | 0.7–18.6     | 0.9–5.1       | 0.9–0.8       | 0.9–1.6     | 1.0–1.2    | 1.1–1.7     | <b>0.7–18.6</b>  | <b>0.6–1.7</b>               |
| <b>CHBr<sub>2</sub>Cl</b>           | Median           | 4.8           | 4.1          | 2.2           | 1.2           | 2.2         | 0.9        | 1.3         | <b>2.4</b>       | <b>0.3</b>                   |
|                                     | Range            | 3.2–5.4       | 2.2–11.0     | 0.4–6.5       | 7.5–0.5       | 0.6–3.6     | 0.5–1.0    | 0.5–2.2     | <b>0.4–11.0</b>  | <b>0.1–0.8</b>               |
| <b>CHBrCl<sub>2</sub></b>           | Median           | 2.6           | 2.5          | 1.6           | 1.0           | 2.4         | 0.9        | 2.0         | <b>1.4</b>       | <b>0.3</b>                   |
|                                     | Range            | 2.6–3.7       | 0.9–9.6      | 1.0–3.0       | 0.5–1.4       | 0.7–3.9     | 0.6–1.1    | 1.3–2.7     | <b>0.5–9.6</b>   | <b>0.1–0.9</b>               |
| <b>C<sub>2</sub>HCl<sub>3</sub></b> | Median           | 1.15          | 1.7          | 1.3           | 1.6           | 1.1         | 2.7        | 1.2         | <b>1.5</b>       | <b>0.5</b>                   |
|                                     | Range            | 0.84–1.22     | 1.0–2.7      | 0.3–10.5      | 0.4–2.9       | 0.4–1.5     | 1.0–4.1    | 0.8–1.6     | <b>0.4–10.5</b>  | <b>0.05–2</b>                |
| <b>CHCl<sub>3</sub></b>             | Median           | 16.9          | 19.8         | 18.2          | 18.7          | 19.0        | 19.8       | 17.3        | <b>18.63</b>     | <b>7.5</b>                   |
|                                     | Range            | 15.9–20.5     | 18.8–25.3    | 14.5–27.9     | 15.4–20.1     | 18.4–57.2   | 18.8–5.3   | 16.5–18.2   | <b>14.5–57.2</b> | <b>7.3–7.8</b>               |
| <b>CH<sub>3</sub>I</b>              | Median           | 0.8           | 1.3          | 1.2           | 1.5           | 1.3         | 1.1        | 1.4         | <b>1.2</b>       | <b>0.8</b>                   |
|                                     | Range            | 0.8–0.8       | 1.0–1.5      | 0.4–2.1       | 1.5–1.2       | 0.8–2.8     | 0.7–1.6    | 1.2–1.6     | <b>0.4–2.8</b>   | <b>0.3–2.1</b>               |
| <b>CH<sub>3</sub>Br</b>             | Mean             | 8.6           | 10.6         | 9.29          | 9.12          | 10.2        | 8.45       | 9.65        | <b>9.1</b>       | <b>7.01<sup>a</sup></b>      |
|                                     | Range            | 8.1–9.4       | 7.8–13.8     | 7.5–13.3      | 8.5–7.5       | 8.3–13.8    | 7.8–9.2    | 9.1–10.2    | <b>7.5–13.8</b>  | <b>6.95–7.07<sup>a</sup></b> |
| <b>CH<sub>3</sub>Cl</b>             | Mean             | 601           | 592          | 617           | 614           | 744         | 633        | 596         | <b>601</b>       | <b>540<sup>a</sup></b>       |
|                                     | Range            | 583–608       | 549–672      | 531–732       | 583–545       | 581–685*    | 591–668    | 583–608     | <b>531–732*</b>  | <b>537–542<sup>a</sup></b>   |

85

86 <sup>a</sup>Mean and range for 2012 based on flask measurements by the US National Oceanic and Atmospheric  
87 Administration (NOAA) (<http://www.esrl.noaa.gov/gmd/dv/site/>) and in situ measurements by the Advanced  
88 Global Atmospheric Gases Experiment (AGAGE) (<http://agage.eas.gatech.edu/>). Measurements are taken from  
89 ground stations, which do not represent the MBL in all cases. See Table 1 in the main text for site abbreviations.

90 \*Calculation excludes one CH<sub>3</sub>Cl measurement at TMRX–ET-1 (see Sect. 2.1.2 in main text).

91 Figure S1 compares the mixing ratios of the measured VHOCs at different distances from the  
 92 seawater, and individually for winter and spring. No clear impact of season or distance from the  
 93 seawater on the mixing ratios can be discerned in this figure, or for the sample taken at  
 94 SEA-KDM, the latter directly representing air masses over the seawater (Sect. 2.1.1 in the main  
 95 text). Additional discussion of these results is included in Sect. 3.2.1 in the main text.

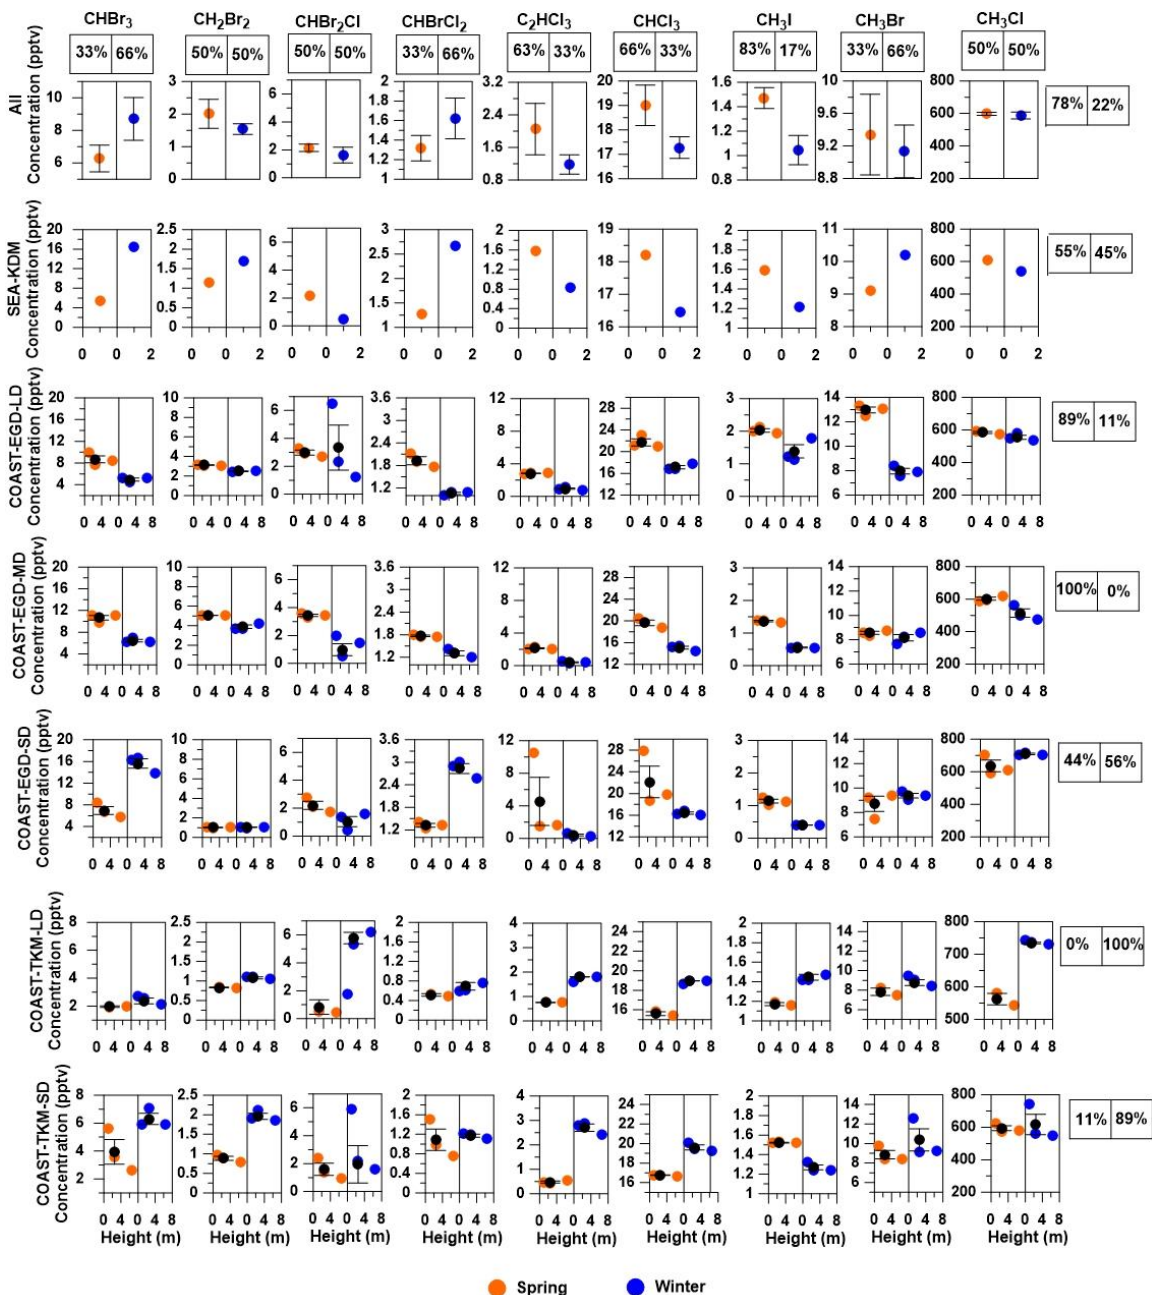

96  
 97 **Figure S1. Seasonal and spatial influences on measured mixing ratios of VHOCs.** Measured VHOC mixing  
 98 ratios are presented vs. vertical height above surface level, separately for winter (blue) and spring (orange). Black  
 99 filled circles and error bars represent average and standard error of the mean, respectively. Values above and to

100 the right of the figure indicate the percentage of time during which average mixing ratios were higher in the spring  
101 (left box) or in the winter (right box), individually for COAST-TKM, COAST-EGD and SEA-KDM sites, and  
102 for all of these sites together (All), for all sites and all species, respectively (see Table 1 in the main text for  
103 measurement site abbreviations).

104

#### 105 **S4. Sampling footprints**

106

107 **Table S4.** Calculated footprint following the methodology of Schuepp et al. (1990). The table shows the date,  
108 time, site name (and abbreviation), sampling heights and 80% and 90% footprints for the lowest (low) and highest  
109 (high) canister during each measurement.

| Date<br>dd/m/yyyy | Time<br>(local) | Site name /<br>measurement<br>abbreviation <sup>a</sup> | Sampling<br>height<br>(m) | 80%<br>footprint<br>low (m) | 80%<br>footprint<br>high (m) | 90%<br>footprint<br>low (m) | 90%<br>footprint<br>high (m) |
|-------------------|-----------------|---------------------------------------------------------|---------------------------|-----------------------------|------------------------------|-----------------------------|------------------------------|
| 20/4/2016         | 08:45–<br>08:55 | BARE-MSMR /<br>BARE-MSMR-1                              | 2.5, 4.5, 7.0             | 293.5                       | 954.9                        | 621.7                       | 2022.3                       |
| 21/4/2016         | 08:45–<br>08:55 | WM-KLY /<br>WM-KLY-1                                    | 1.0,2.0,4.0               | 105.7                       | 502.6                        | 223.9                       | 1064.5                       |
| 02/5/2016         | 08:45–<br>08:55 | TMRX-ET /<br>TMRX-ET-1                                  | 4.5, 5.5, 7.5             | 135.6                       | 444.2                        | 287.2                       | 940.8                        |
| 03/5/2016         | 08:45–<br>08:55 | WM-KLY /<br>WM-KLY-2                                    | 1.0, 2.0, 4.0             | 105.7                       | 502.6                        | 223.9                       | 1064.5                       |
| 25/5/2016         | 08:30–<br>08:40 | BARE-MSD /<br>BARE-MSD-1                                | 1.25, 2.5, 5              | 126.2                       | 643.3                        | 267.3                       | 1362.4                       |
| 26/5/2016         | 08:30–<br>08:40 | BARE-MSD /<br>BARE-MSD-2                                | 1.25, 2.5, 5              | 126.2                       | 643.3                        | 267.3                       | 1362.4                       |
| 30/5/2016         | 12:00–<br>12:10 | TMRX-ET /<br>TMRX-ET-2                                  | 4.5, 5.5, 7.5             | 135.6                       | 444.2                        | 287.2                       | 940.8                        |
| 31/5/2016         | 12:00–<br>12:10 | BARE-MSMR /<br>BARE-MSMR-2                              | 2.5, 4.5, 7               | 293.5                       | 954.9                        | 621.7                       | 2022.3                       |
| 11/7/2016         | 12:00–<br>12:20 | BARE-MSD /<br>BARE-MSD-3                                | 1.25, 2.5, 5              | 126.2                       | 643.3                        | 267.3                       | 1362.4                       |
| 11/7/2016         | 18:00–<br>18:20 | BARE-MSD /<br>BARE-MSD-4                                | 1.25, 2.5, 5              | 126.2                       | 643.3                        | 267.3                       | 1362.4                       |
| 21/2/2017         | 11:20–<br>11:40 | COAST-TKM-SD /<br>COAST-TKM-SD-w                        | 1, 2.5, 6.5               | 126.8                       | 932.0                        | 268.6                       | 1973.9                       |
| 22/2/2017         | 11:00–<br>11:20 | COAST-TKM-LD /<br>COAST-TKM-LD-w                        | 1.5, 3, 7                 | 94.1                        | 717.5                        | 199.3                       | 1519.6                       |
| 28/2/2017         | 11:20–<br>11:40 | COAST-EGD-SD /<br>COAST-EGD-SD-w                        | 1, 2.5, 6.5               | 126.8                       | 932.0                        | 268.6                       | 1973.9                       |
| 01/3/2017         | 11:07–<br>11:27 | COAST-EGD-MD /<br>COAST-EGD-MD-w                        | 1, 2.5, 6.5               | 126.8                       | 932.0                        | 268.6                       | 1973.9                       |
| 02/3/2017         | 11:00–<br>11:20 | COAST-EGD-LD /<br>COAST-EGD-LD-w                        | 1, 2.5, 6.5               | 126.8                       | 932.0                        | 268.6                       | 1973.9                       |
| 25/4/2017         | 11:30–<br>11:50 | COAS-EGD-SD /<br>COAST-EGD-SD-s                         | 1, 2.5, 6.5               | 126.8                       | 932.0                        | 268.6                       | 1973.9                       |
| 26/4/2017         | 11:00–<br>11:20 | COAST-EGD-MD /<br>COAST-EGD-MD-s                        | 1, 2.5, 6.5               | 98.3                        | 722.5                        | 208.2                       | 1530.2                       |
| 27/4/2017         | 11:00–<br>11:20 | COAST-EGD-LD /<br>COAST-EGD-LD-s                        | 1, 2.5, 6.5               | 126.8                       | 932.0                        | 268.6                       | 1973.9                       |
| 03/5/2017         | 12:10–<br>12:30 | COAST-TKM-SD /<br>COAST-TKM-SD-s                        | 1, 2.5, 6.5               | 126.8                       | 932.0                        | 268.6                       | 1973.9                       |
| 04/5/2017         | 10:30–<br>10:50 | COAST-TKM-LD /<br>COAST-TKM-LD-s                        | 1.5, 3, 7                 | 94.1                        | 717.5                        | 199.3                       | 1519.6                       |

110 <sup>a</sup> Suffixes "s" and "w" refer to samples taken during the spring and winter, respectively. SD, MD, and LD refer to  
111 relatively short, medium, and long distance from the coastline, respectively (see Sect. 2.1 in the main text).  
112 Additional abbreviations: MSD, Masada; MSMR, Mishmar; KLY, Kalya; ET, Ein Tamar; KDM, Kedem; EGD,  
113 Ein Gedi; BARE, bare soil site; COAST, coastal soil–salt mixture site; WM, agricultural watermelon-cultivation  
114 site; TMRX, natural *Tamarix* site; SEA, sampling near the seawater (see Sect. 2.1.1 in the main text).

115

## 116 **S5. Anthropogenic influence during the measurements**

117 We used the measured mixing ratios of C<sub>2</sub>HCl<sub>3</sub> and C<sub>2</sub>Cl<sub>4</sub> to explore potential influences on the  
118 sampled air composition, considering that these two species typically have a dominant  
119 anthropogenic origin (Zhou et al., 2005). Table S5 presents the Pearson correlation coefficients  
120 for the correlations between the VHOCs that were investigated in this work. The table indicates  
121 a much higher correlation between C<sub>2</sub>HCl<sub>3</sub> and C<sub>2</sub>Cl<sub>4</sub> compared to all other correlations,  
122 indicating an anthropogenic source for C<sub>2</sub>HCl<sub>3</sub> ( $p < 0.05$ ).

123

124 **Table S5.** Pearson correlation coefficient for the correlation between the investigated VHOCs.

|                                 | C <sub>2</sub> HCl <sub>3</sub> | C <sub>2</sub> Cl <sub>4</sub> |
|---------------------------------|---------------------------------|--------------------------------|
| CHCl <sub>3</sub>               | 0.27                            | 0.27                           |
| C <sub>2</sub> HCl <sub>3</sub> | 1.00                            | 0.73                           |
| C <sub>2</sub> Cl <sub>4</sub>  | 0.73                            | 1.00                           |
| CH <sub>3</sub> Cl              | 0.04                            | 0.12                           |
| CH <sub>3</sub> Br              | 0.12                            | 0.16                           |
| CH <sub>3</sub> I               | 0.21                            | 0.22                           |
| CH <sub>2</sub> Br <sub>2</sub> | 0.00                            | 0.01                           |
| CHBrCl <sub>2</sub>             | 0.04                            | -0.12                          |
| CHBr <sub>2</sub> Cl            | 0.15                            | 0.12                           |
| CHBr <sub>3</sub>               | 0.02                            | -0.11                          |

125

126 To further investigate the origin of C<sub>2</sub>HCl<sub>3</sub> and C<sub>2</sub>Cl<sub>4</sub>, we plotted their measured mixing  
127 ratios as well as the [C<sub>2</sub>Cl<sub>4</sub>]/[C<sub>2</sub>HCl<sub>3</sub>] ratio vs. corresponding wind direction (Fig. S2). The  
128 ratio between the two species can be used to evaluate the transportation duration of the  
129 sampled air masses between the anthropogenic origin and the sampling point, considering the  
130 significantly longer atmospheric lifetime of C<sub>2</sub>Cl<sub>4</sub> (3.5–4 months; (Olague, 2002; Singh et al.,

131 1996)), compared to  $C_2HCl_3$  (~7 days; (Quack and Suess, 1999)). It should be emphasized,  
 132 however, that the ratio  $[C_2Cl_4]/[C_2HCl_3]$  may vary with time for a specific emission source,  
 133 and our measurements are also potentially exposed to more than a single anthropogenic origin.  
 134 The apparently dominant origin in the study area is, however, the Dead Sea Works (DSW),  
 135 located a few kilometers to the south of most measurement sites (see Fig. 1 in the main text).  
 136 Other potential emission sources were generally located at least a few dozen kilometers from  
 137 the study area. It should be further emphasized that Fig. S2a presents  $C_2Cl_4$  and  $C_2HCl_3$  mixing  
 138 ratios and  $[C_2Cl_4]/[C_2HCl_3]$  collectively for all measurement sites located to the north of the  
 139 DSW. The justification for this is the relatively short distances between these sites, compared  
 140 to that between any of these sites and a potential origin for anthropogenic VHOC emission  
 141 other than the DSW. Fig. S2b presents  $C_2Cl_4$  mixing ratios and  $[C_2Cl_4]/[C_2HCl_3]$  individually  
 142 for TMRX–ET, which is located ~1.7 km south of the DSW.

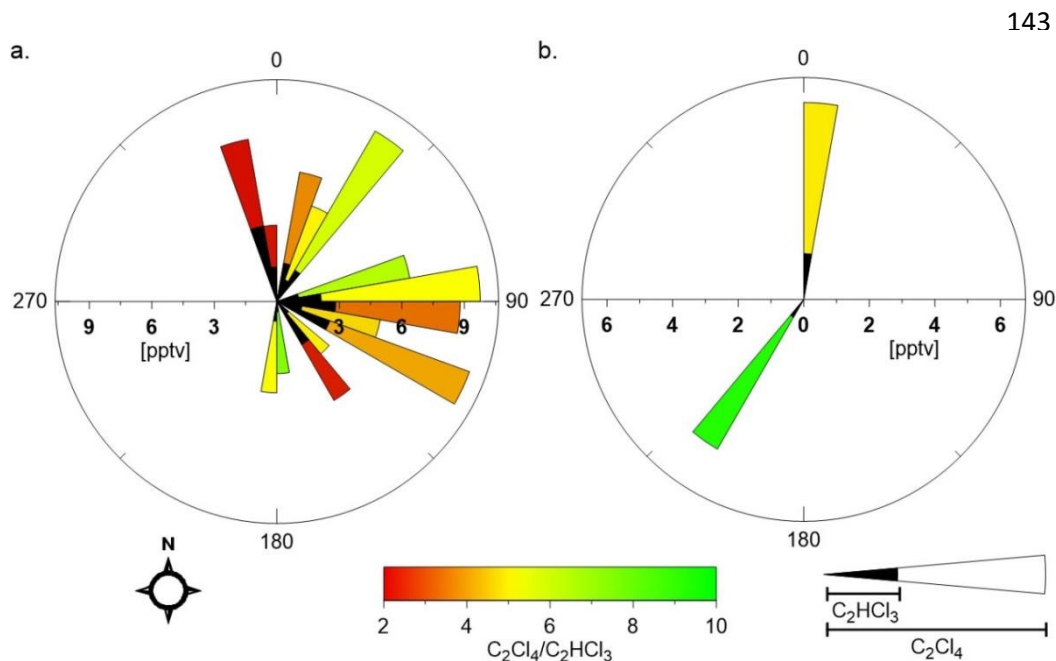

153 **Figure S2.** Anthropogenic impact on measured VHOCs. Presented are the  $C_2Cl_4$  and  $C_2HCl_3$  mixing ratios vs.  $10^\circ$   
 154 wind direction (WDD) sectors, as well as the  $[C_2Cl_4]/[C_2HCl_3]$  which is indicated by color, for all sites to the  
 155 north of the Dead Sea Works (a) and TMRX–ET, which is located to the south of the Dead Sea Works (b).



156 Figure S2a shows elevated contribution from the eastern sector (apparently from the  
157 eastern coast of the Dead Sea, i.e., from Jordan) to the mixing ratios of  $C_2Cl_4$  and to some  
158 extent also to those of  $C_2HCl_3$ , compared to the other wind sectors. It does not support  
159 contribution from the DSW which is located some dozens of kilometers to the south of these  
160 sites (see Fig. 1 in the main text). Potentially, the relatively small  $[C_2Cl_4]/[C_2HCl_3]$  from the  
161  $140^\circ$ – $150^\circ$  sector, suggesting relatively fresh emission, could be attributed to emission from the  
162 DSW, which could indicate no elevated contribution to  $C_2HCl_3$  or  $C_2Cl_4$  from the DSW.  
163 Furthermore, Fig. S2b demonstrates that the single measurement that can be attributed to  
164 emission from the DSW (from the  $0^\circ$ – $10^\circ$  sector) for TMRX–ET, which is significantly closer  
165 to the DSW than the other sites, corresponds to significantly less fresh emission compared with  
166 those measured at the other sites for the  $140^\circ$ – $150^\circ$  sector. Moreover, the mixing ratios of both  
167  $C_2HCl_3$  and  $C_2Cl_4$ , which correspond to the  $0^\circ$ – $10^\circ$  wind direction sector (Fig. S2b), seem to  
168 not be elevated compared to the corresponding mixing ratios measured at the other sites.  
169 Nevertheless, additional measurements are required to better analyze the contribution of  
170 anthropogenic origin to the mixing ratios of these species at the Dead Sea.

171 **S6. In situ-measured meteorological parameters during the air sampling**

172

173 **Table S6.** Summary of measured meteorological data during the different samplings. Summary of VHOCs over  
 174 the Dead Sea. The table shows the date, time, site name (and abbreviation), as well as the average and standard  
 175 deviation, in parentheses, for the following parameters: wind speed (WDS), wind direction (WDD) and wind  
 176 vector (WDDV), temperature (T), relative humidity (RH), global solar radiation (GSR).

| Date<br>dd/m/yyyy | Time<br>(local) | Site name /<br>measurement<br>abbreviation <sup>a</sup> | WDS<br>(m/s)   | WDD<br>(°)        | WDDV<br>(°)       | T<br>(°C)       | RH<br>(%)       | GSR<br>(%)       |
|-------------------|-----------------|---------------------------------------------------------|----------------|-------------------|-------------------|-----------------|-----------------|------------------|
| 20/4/2016         | 08:45–<br>08:55 | BARE-MSMR /<br>BARE-MSMR-1                              | 6.39<br>(0.52) | 10.16<br>(1.57)   | 10.11<br>(1.22)   | 29.63<br>(0.24) | 28.48<br>(0.99) | 618.4<br>(13.0)  |
| 21/4/2016         | 08:45–<br>08:55 | WM-KLY /<br>WM-KLY-1                                    | 6.27<br>(0.71) | 13.65<br>(3.19)   | 13.91<br>(5.52)   | 27.72<br>(0.12) | 20.98<br>(0.84) | 332.5<br>(12.1)  |
| 02/5/2016         | 08:45–<br>08:55 | TMRX-ET /<br>TMRX-ET-1                                  | 1.87<br>(0.29) | 214.99<br>(16.78) | 214.40<br>(12.35) | 26.50<br>(0.12) | 48.76<br>(0.46) | 538.1<br>(8.9)   |
| 03/5/2016         | 08:45–<br>08:55 | WM-KLY /<br>WM-KLY-2                                    | 3.74<br>(0.44) | 340.19<br>(4.30)  | 340.33<br>(10.95) | 25.93<br>(0.12) | 45.71<br>(0.46) | 225.5<br>(8.9)   |
| 25/5/2016         | 08:30–<br>08:40 | BARE-MSD /<br>BARE-MSD-1                                | 1.86<br>(0.27) | 104.00<br>(15.65) | 103.92<br>(19.44) | 26.46<br>(0.13) | 48.26<br>(0.52) | 518.9<br>(10.6)  |
| 26/5/2016         | 08:30–<br>08:40 | BARE-MSD /<br>BARE-MSD-2                                | 2.56<br>(0.65) | 141.03<br>(12.26) | 141.71<br>(19.42) | 28.48<br>(0.09) | 34.06<br>(0.49) | 497.6<br>(10.1)  |
| 30/5/2016         | 12:00–<br>12:10 | WM-ET /<br>TMRX-ET-2                                    | 2.75<br>(0.52) | 9.42<br>(18.42)   | 9.40<br>(13.50)   | 31.16<br>(0.32) | 29.94<br>(0.89) | 1044.5<br>(2.4)  |
| 31/5/2016         | 12:00–<br>12:10 | BARE-MSMR /<br>BARE-MSMR-2                              | 2.90<br>(0.34) | 78.26<br>(8.52)   | 78.47<br>(5.40)   | 30.83<br>(0.29) | 30.64<br>(0.97) | 1027.4<br>(1.6)  |
| 11/7/2016         | 12:00–<br>12:20 | BARE-MSD /<br>BARE-MSD-3                                | 1.91<br>(0.65) | 12.12<br>(39.32)  | 21.69<br>(12.47)  | 36.60<br>(0.35) | 33.96<br>(0.87) | 1000.7<br>(6.4)  |
| 11/7/2016         | 18:00–<br>18:20 | BARE-MSD /<br>BARE-MSD-4                                | 3.35<br>(0.38) | 350.53<br>(9.46)  | 350.61<br>(9.53)  | 40.19<br>(0.15) | 22.46<br>(0.30) | 260.00<br>(24.9) |
| 21/2/2017         | 11:20–<br>11:40 | COAST-TKM-SD /<br>COAST-TKM-SD-w                        | 2.36<br>(0.55) | 111.13<br>(12.84) | 111.95<br>(13.77) | 18.50<br>(0.15) | 37.32<br>(0.61) | 790.1<br>(4.4)   |
| 22/2/2017         | 11:00–<br>11:20 | COAST-TKM-LD /<br>COAST-TKM-LD-w                        | 2.91<br>(0.52) | 29.85<br>(12.11)  | 30.66<br>(5.35)   | 20.29<br>(0.16) | 34.01<br>(0.28) | 454.1<br>(47.9)  |
| 28/2/2017         | 11:20–<br>11:40 | COAST-EGD-SD /<br>COAST-EGD-SD-w                        | 7.90<br>(0.64) | 13.60<br>(3.19)   | 13.61<br>(1.96)   | 24.71<br>(0.13) | 27.70<br>(1.92) | 314.1<br>(82.1)  |
| 01/3/2017         | 11:07–<br>11:27 | COAST-EGD-MD /<br>COAST-EGD-MD-w                        | 8.23<br>(1.05) | 28.06<br>(5.08)   | 28.09<br>(1.34)   | 22.12<br>(0.38) | 55.06<br>(0.58) | 506.9<br>(93.9)  |
| 02/3/2017         | 11:00–<br>11:20 | COAST-EGD-LD /<br>COAST-EGD-LD-w                        | 8.32<br>(0.96) | 182.17<br>(5.96)  | 182.28<br>(6.38)  | 23.49<br>(0.19) | 44.43<br>(0.45) | 345.5<br>(68.0)  |
| 25/4/2017         | 11:30–<br>11:50 | COAST-EGD-SD /<br>COAST-EGD-SD-s                        | 5.40<br>(0.31) | 16.30<br>(3.97)   | 16.33<br>(2.88)   | 23.65<br>(0.16) | 42.99<br>(1.03) | 1031.5<br>(0.95) |
| 26/4/2017         | 11:00–<br>11:20 | COAST-EGD-MD /<br>COAST-EGD-MD-s                        | 2.15<br>(0.25) | 82.45<br>(8.05)   | 82.15<br>(6.42)   | 26.37<br>(0.29) | 33.67<br>(0.38) | 831.5<br>(10.8)  |
| 27/4/2017         | 11:00–<br>11:20 | COAST-EGD-LD /<br>COAST-EGD-LD-s                        | 2.39<br>(0.77) | 104.12<br>(23.19) | 98.01<br>(14.98)  | 27.03<br>(0.19) | 42.27<br>(0.54) | 707.9<br>(153.8) |
| 03/5/2017         | 12:10–<br>12:30 | COAST-TKM-SD /<br>COAST-TKM-SD-s                        | 2.80<br>(0.41) | 174.49<br>(19.14) | 174.76<br>(21.93) | 28.44<br>(0.33) | 36.21<br>(1.05) | 961.6<br>(7.4)   |
| 04/5/2017         | 10:30–<br>10:50 | COAST-TKM-LD /<br>COAST-TKM-LD-s                        | 2.70<br>(0.43) | 132.88<br>(16.62) | 132.16<br>(17.79) | 26.11<br>(0.25) | 45.25<br>(1.21) | 871.8<br>(13.1)  |

177

178 <sup>a</sup> The suffixes "s" and "w" refer to samples taken during the spring and winter, respectively. SD, MD, and LD

179 refer to relatively short, medium, and long distance from the coastline, respectively (see Sect. 2.1 in the main

180 text). Additional abbreviations: MSD, Masada; MSMR, Mishmar; KLY, Kalya; ET, Ein Tamar; KDM, Kedem;  
181 EGD, Ein Gedi; BARE, bare soil site; COAST, coastal soil–salt mixture site; WM, agricultural watermelon-  
182 cultivation site; TMRX, natural *Tamarix* site; SEA, sampling near the seawater (see Sect. 2.1.1 in the main text).

183

#### 184 **References**

- 185 Carpenter, L. J., Reimann, S., Burkholder, J. B., Clerbaux, C., Hall, B. D., Hossaini, R., Laube, J. C., and  
186 Yvon-Lewis, S. A.: Ozone-depleting substances (ODSs) and other gases of interest to the  
187 Montreal Protocol, Chapter 1 in Scientific Assessment of Ozone Depletion: 2014, Global Ozone  
188 Research and Monitoring Project – Report No. 55, World Meteorological Organization, Geneva,  
189 Switzerland, 2014.
- 190 Olaguer, E. P.: The distribution of the chlorinated solvents dichloromethane, perchloroethylene, and  
191 trichloroethylene in the global atmosphere, *Environ Sci Pollut R*, 9, 175-  
192 182,10.1065/espr2001.06.080, 2002.
- 193 Quack, B., and Suess, E.: Volatile halogenated hydrocarbons over the western Pacific between 43  
194 degrees and 4 degrees N, *J Geophys Res-Atmos*, 104, 1663-1678, Doi 10.1029/98jd02730, 1999.
- 195 Schuepp, P. H., Leclerc, M. Y., Macpherson, J. I., and Desjardins, R. L.: Footprint Prediction of Scalar  
196 Fluxes from Analytical Solutions of the Diffusion Equation, *Bound-Lay Meteorol*, 50, 353-373,  
197 1990.
- 198 Singh, H. B., Thakur, A. N., Chen, Y. E., and Kanakidou, M.: Tetrachloroethylene as an indicator of low  
199 Cl atom concentrations in the troposphere (vol 23, pg 1529, 1996), *Geophys Res Lett*, 23, 2713-  
200 2713, Doi 10.1029/96gl02556, 1996.
- 201 Zhou, Y., Varner, R. K., Russo, R. S., Wingenter, O. W., Haase, K. B., Talbot, R., and Sive, B. C.: Coastal  
202 water source of short-lived halocarbons in New England, *J Geophys Res-Atmos*, 110, Artn  
203 D2130210.1029/2004jd005603, 2005.
